# Supplementary material for: The Influence of Immunization Route, Tissue Microenvironment, and Cytokine Cell Milieu on HIV-Specific CD8+ T Cells Measured Using Fluidigm Dynamic Arrays
Source: PLoS One. 2015 May 6;10(5):e0126487. doi: 10.1371/journal.pone.0126487 (PMC4422706; doi:10.1371/journal.pone.0126487)
Supplement: S2 Dataset — (XLSX) [file pone.0126487.s002.xlsx]

## Sheet: Sheet 1
Group no.	Sample	RpL32	IFN-γ	IL-2	TNF-α	IL-4	IL-13	IL-17	MIP-1α	MIP-1β	RANTES	Gzm A	Gzm B	Gzm C	Perforin1	Sell	Selplg	CD69	CCR5	CCR7	CCR9	CCR10	Itg α4	Itg αE	Itg αL	Itg αM	Itg αX	Itg αD	Itg β1	Itg β2	Itg β7
1	Balb/c Spleen	15.8353	18.9372	999	20.5968	999	999	999	22.2286	16.9852	11.7026	16.0366	20.6056	999	17.8132	999	19.5284	22.8988	20.1768	21.1184	999	999	16.4652	999	999	20.8019	20.9831	999	16.9759	19.8082	17.372
1	Balb/c Spleen	15.8641	19.4132	999	20.7027	999	999	999	22.1339	17.0247	12.2134	16.3368	21.8075	999	17.807	999	20.4834	23.0113	20.807	999	999	999	16.811	999	20.5349	20.7936	21.498	999	17.0396	20.2035	17.8157
1	Balb/c Spleen	15.1944	18.2101	999	19.3643	999	999	999	19.8584	15.6692	11.8282	15.8809	19.6531	999	17.8158	999	18.8363	19.7264	18.8368	20.1828	999	999	15.9453	999	999	19.6079	19.8121	999	16.263	18.6819	16.9116
1	Balb/c Spleen	15.2657	999	999	19.7554	999	999	999	20.9358	16.2389	11.6632	15.416	19.4471	999	16.9916	999	19.1716	999	999	19.7184	999	999	16.0511	999	999	19.2683	19.8665	999	16.7769	19.0567	16.8144
1	Balb/c Spleen	14.5511	999	999	16.4911	999	999	999	16.0857	14.9385	11.2184	14.5554	999	999	15.8427	999	999	999	15.9911	999	999	999	14.958	999	999	17.1366	999	999	15.5072	16.4168	15.3621
1	Balb/c Spleen	14.1478	999	999	19.093	999	999	999	999	16.051	10.5912	13.0785	17.7692	999	15.9414	999	15.4705	20.4805	18.6723	20.4681	999	999	14.9422	21.6797	15.5734	20.1235	19.7266	999	15.1195	17.9782	15.4389
2	Balb/c Peyer's patch	17.3486	999	24.9997	999	999	999	999	24.2277	19.4603	14.542	19.2051	999	999	22.8961	26.6599	23.355	24.8135	22.1341	999	999	999	19.6022	21.2903	999	999	23.8594	999	20.9197	21.8451	21.5556
2	Balb/c Peyer's patch	17.7731	27.5255	999	23.8069	999	999	999	26.8273	21.0389	16.6327	30.4208	29.1899	999	999	24.2459	28.1273	999	999	24.4594	999	29.7343	22.1608	999	999	999	27.3416	999	24.3593	23.9287	22.325
2	Balb/c Peyer's patch	13.3518	999	999	17.8315	999	999	999	999	16.4096	11.2008	14.1662	17.1469	999	17.4091	999	16.301	999	17.2899	17.4073	999	999	15.0085	17.0696	999	999	999	999	16.9158	17.9619	16.6407
2	Balb/c Peyer's patch	13.5214	999	999	17.6002	999	999	999	999	16.5021	11.4	13.9836	16.7156	999	17.3142	16.16	16.1829	17.239	18.3052	17.0369	999	999	15.4839	16.557	999	21.6312	999	999	15.9677	17.9447	15.7043
2	Balb/c Peyer's patch	17.3574	23.6851	28.5557	22.784	999	999	999	25.5166	19.6214	14.3979	17.8905	20.4624	999	19.9384	24.7672	21.8961	22.4845	23.1361	24.1402	24.8469	999	18.8432	21.6449	999	999	23.8923	999	21.1962	23.5044	20.1462
2	Balb/c Peyer's patch	17.4976	23.8728	999	22.5623	999	999	999	24.8998	19.045	14.2483	17.8266	21.4185	999	20.3619	24.1369	20.7378	22.393	23.0165	27.4091	999	33.3396	18.7327	22.4657	999	999	23.8053	999	20.8531	24.235	20.461
3	IL-13 KO Spleen	15.864	999	999	20.6925	999	999	999	22.6708	16.8413	12.1708	17.4954	21.5853	999	18.5783	999	20.9108	20.7961	20.7218	23.1766	999	999	16.7629	999	20.9034	22.5002	21.428	999	17.8147	21.2389	17.7802
3	IL-13 KO Spleen	15.5907	19.688	999	20.2146	999	999	999	22.1886	16.5109	11.9898	16.327	999	999	17.5825	999	999	21.4315	999	999	999	999	16.4148	999	999	19.061	19.7341	999	17.2313	19.9808	17.4351
3	IL-13 KO Spleen	14.8104	999	999	18.6561	999	999	999	19.3651	15.7265	11.661	15.7984	19.223	999	16.8959	999	999	18.6731	18.9303	19.2425	999	999	15.7485	999	17.3482	999	999	999	16.2777	18.3994	16.5269
3	IL-13 KO Spleen	14.9118	17.0324	999	17.9025	999	999	18.8111	18.4162	15.3709	11.479	15.0613	17.9399	999	16.2758	999	17.9933	17.7524	16.8629	999	17.9035	999	15.5127	999	999	17.6798	999	999	16.3269	17.721	15.5874
3	IL-13 KO Spleen	13.8786	999	999	19.1935	999	999	999	999	15.1597	10.1107	14.4813	17.0888	999	16.1572	999	15.2737	999	17.8881	999	999	999	15.1371	999	999	18.8907	17.4746	999	15.1317	17.91	14.6423
4	IL-13 KO Peyer's patch	19.7875	999	999	999	999	999	999	30.347	21.9014	16.9463	23.7105	26.5851	999	24.7376	999	27.2672	24.5309	24.3652	999	999	999	23.7446	999	999	999	999	999	999	25.9073	23.4809
4	IL-13 KO Peyer's patch	19.2856	25.587	999	24.2607	999	999	999	29.2653	22.4682	17.2401	999	24.5038	999	24.7098	999	25.1853	24.6516	24.1067	999	31.0827	999	21.5564	22.9604	999	999	999	999	23.8238	999	25.5671
4	IL-13 KO Peyer's patch	19.4327	999	999	24.6957	999	999	999	999	20.5927	16.171	999	25.5618	999	27.544	999	999	27.2545	30.2189	30.0913	999	999	23.7111	999	999	999	25.0622	999	24.0149	23.8368	22.708
4	IL-13 KO Peyer's patch	19.3114	999	999	999	999	999	999	999	21.3819	16.5391	27.6745	26.4511	999	26.3228	28.4595	27.8278	25.2931	24.968	999	28.2709	28.3632	23.5439	999	999	24.6722	25.9688	999	24.8307	28.0105	22.2163
4	IL-13 KO Peyer's patch	19.1263	999	999	27.3516	999	999	999	999	20.7228	15.0383	24.3977	27.2976	999	24.6587	999	999	24.3886	999	999	999	999	22.6558	999	999	999	999	999	25.3422	24.7966	21.8106
4	IL-13 KO Peyer's patch	16.4165	22.3479	999	20.7713	23.0647	999	999	999	18.7018	13.8058	18.9041	20.9901	999	19.6658	20.7384	18.9114	999	20.0491	21.4632	999	24.6207	18.0711	22.6219	18.8719	21.826	22.0204	999	18.9618	20.111	18.212
4	IL-13 KO Peyer's patch	17.051	999	25.7232	20.6711	25.3586	26.2863	25.9279	26.4082	19.0842	13.9607	17.8629	20.1171	999	19.3969	999	19.403	21.2824	20.6743	22.4938	24.9857	25.7668	18.1428	20.8637	20.1505	21.993	22.2782	20.2161	19.5981	20.5886	18.9083
4	IL-13 KO Peyer's patch	17.5381	22.2603	30.5513	22.1292	33.0523	999	999	26.9098	19.1732	14.4986	20.9656	25.904	999	20.2689	23.2245	22.2888	24.9908	22.7342	26.0347	999	24.5844	18.7335	24.8827	999	999	24.9074	999	21.5617	23.5261	21.0156
4	IL-13 KO Peyer's patch	17.3875	24.4164	28.7432	21.5373	999	999	999	26.2827	19.8528	14.0941	20.7614	22.1307	999	19.948	23.8988	21.0354	22.904	22.4283	24.5177	999	999	18.7186	22.9829	999	23.8004	999	999	21.8577	22.7673	20.1113
